# Supplementary material for: One-Pot Spray Engineering to Design Na0.44MnO2 Cathode Electrodes for High-Rate and Cycle-Stable Na-Ion Batteries
Source: MDPI journal article supplement (doi:10.3390/batteries8100181), 2022-10-14
Supplement: s1 [file s1]

# Supplementary material

## **One-pot spray engineering to design Na<sub>0.44</sub>MnO<sub>2</sub> cathode electrodes for high-rate and cycle-stable Na-ion battery**

Bon-Ryul Koo<sup>a</sup>, Young-Geun Lee<sup>b</sup>, Sang Ho Lee<sup>c</sup>, Geon-Hyoung An<sup>b,d,\*\*</sup>, Chun Huang<sup>e,f,g,a\*</sup>

<sup>a</sup>Department of Materials, University of Oxford, Parks Road, Oxford, OX1 3PH, UK

<sup>b</sup>Department of Energy Engineering, Future Convergence Technology Research Institute, Gyeongsang National University, 33 Dongjin-ro, Jinju, Gyeongnam 52828, Republic of Korea

<sup>c</sup>Department of Chemical Engineering, Pukyong National University, Busan 48513, South Korea

<sup>d</sup>Department of Energy System Engineering, Gyeongsang National University, 33 Dongjin-ro, Jinju, Gyeongnam 52828, Republic of Korea

<sup>e</sup>Department of Materials, Imperial College London, London, SW7 2AZ, UK

<sup>f</sup>The Faraday Institution, Quad One, Becquerel Ave, Harwell Campus, Didcot, OX11 0RA, UK

<sup>g</sup>Research Complex at Harwell, Rutherford Appleton Laboratory, Didcot, OX11 0FA, UK

---

<sup>\*\*</sup>Corresponding author.

E-mail address: ghan@gnu.ac.kr (G.-H. An)

<sup>\*</sup>Corresponding author.

E-mail address: [a.huang@imperial.ac.uk](mailto:a.huang@imperial.ac.uk) (C. Huang)

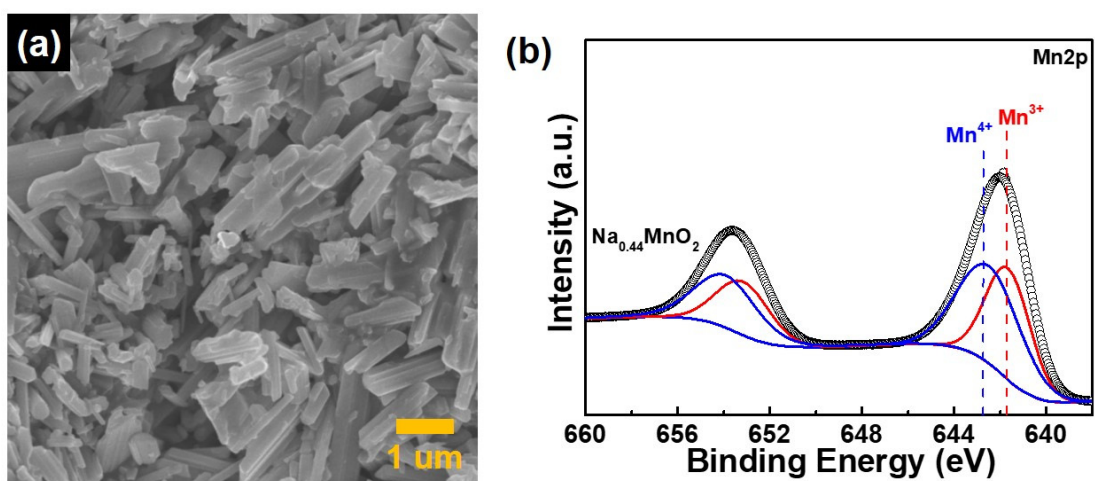

**Figure S1.** (a) SEM image and Mn 2p XPS spectra of  $\text{Na}_{0.44}\text{MnO}_2$  nanorods formed by sol-gel method.

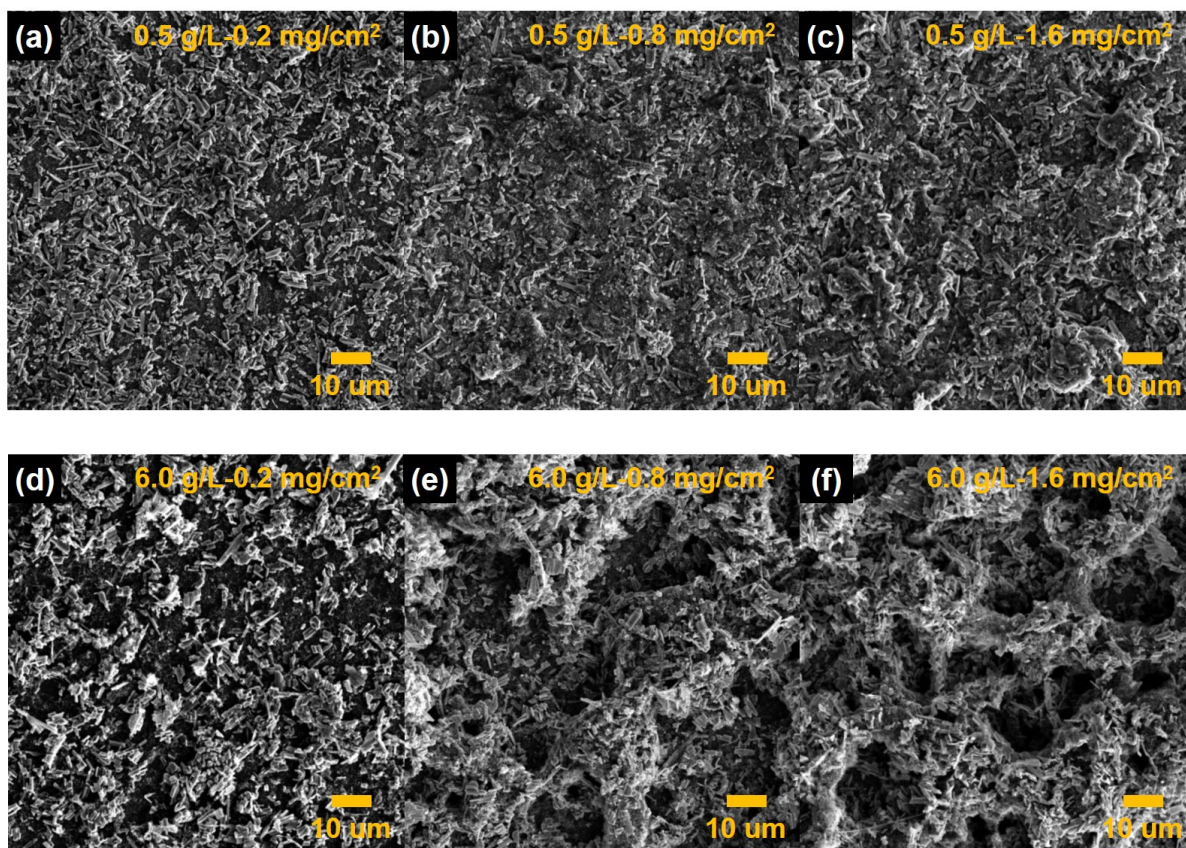

**Figure S2.** Comparison of surface morphology between 0.5 g/L and 6.0 g/L electrodes as increasing loading densities from 0.2 to 1.6 mg/cm<sup>2</sup>.

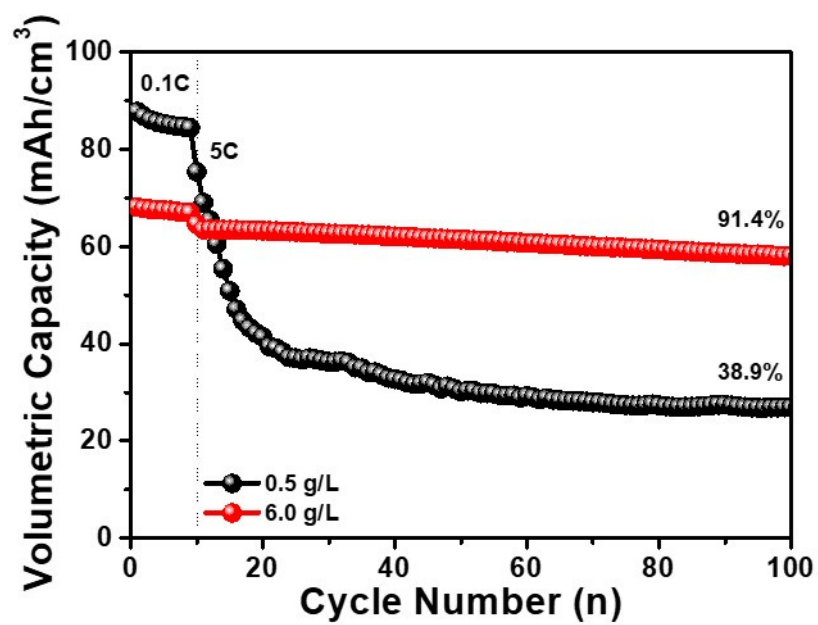

**Figure S3.** Cycling performances in volumetric capacity of 0.5 g/L and 6.0 g/L electrodes traced in voltage range of 1.5–4.3 V at 0.1 C for the first 10 cycles and at 5 C for the rest of the cycles.

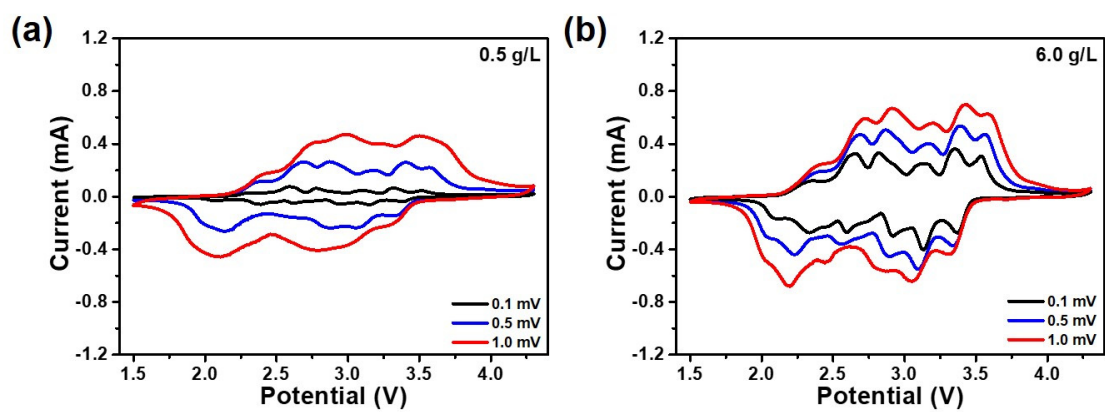

**Figure S4.** CV curves of (a) 0.5 g/L and (b) 6.0 g/L electrodes recorded at various scan rates of 0.1, 0.5, and 1.0 mV.

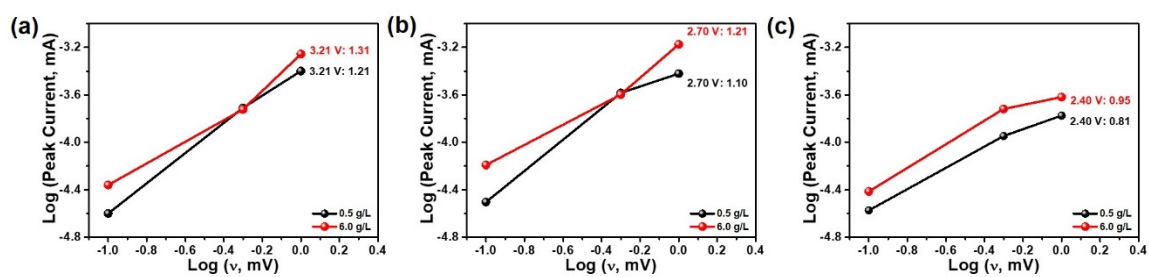

**Figure S5** Log  $i$ –log  $v$  plot of 0.5 g/L and 6.0 g/L electrodes in various specific voltage ((a) 3.21 V, (b) 2.71 V, and (c) 2.40 V).

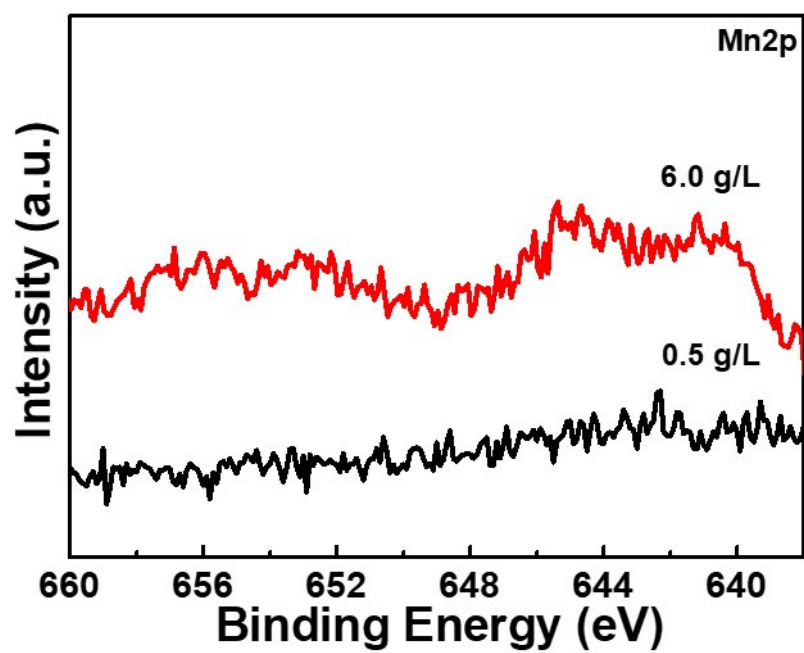

**Figure S6.** Mn 2p XPS spectra of 0.5 g/L and 6.0 g/L electrodes after 100 cycling at 5 C-rate.

**Table S1.** Na-ion Diffusion coefficient of all electrodes measured at the specific potentials.

| Samples           | $D$ [cm <sup>2</sup> /s] |                       |                       |                       |
|-------------------|--------------------------|-----------------------|-----------------------|-----------------------|
|                   | Anodic 3.3-3.5 V         | Anodic 2.7-3.0 V      | Cathodic 3.0-3.2 V    | Cathodic 2.1-.2.4 V   |
| 0.5 g/L electrode | $4.02 \times 10^{-6}$    | $3.05 \times 10^{-6}$ | $4.54 \times 10^{-6}$ | $2.55 \times 10^{-6}$ |
| 4.0 g/L electrode | $8.72 \times 10^{-6}$    | $7.27 \times 10^{-6}$ | $5.27 \times 10^{-6}$ | $5.81 \times 10^{-6}$ |
| 6.0 g/L electrode | $9.88 \times 10^{-6}$    | $8.99 \times 10^{-6}$ | $7.29 \times 10^{-6}$ | $8.82 \times 10^{-6}$ |
| 8.0 g/L electrode | $8.97 \times 10^{-6}$    | $8.09 \times 10^{-6}$ | $7.05 \times 10^{-6}$ | $7.67 \times 10^{-6}$ |
